# Supplementary material for: Highly efficient light-converting films based on diketopyrrolopyrrole with deep-red aggregation-induced emission for enhancing the lipid productivity of Chlorella sp.
Source: Royal Society of Chemistry journal article supplement (doi:10.1039/d1se00638j), 2021-01-01
Supplement: d1se00638j1.pdf [file d1se00638j1.pdf]

Electronic Supplementary Information

**Highly efficient light-converting films based on diketopyrrolopyrrole with deep-red aggregation-induced emission for enhancing lipid productivity of *Chlorella* sp.**

*Tae Gyu Hwang<sup>a, c</sup>, Ga-Yeong Kim<sup>b</sup>, Jong-In Han<sup>b</sup>, Jong Mok Park<sup>c</sup>, Jae Pil Kim<sup>a, \*</sup>*

<sup>a</sup> Lab. of Organic Photo-functional Materials, Department of Materials Science and Engineering, Seoul National University, Seoul 08826, Republic of Korea.

<sup>b</sup> Department of Civil and Environmental Engineering, KAIST, 291 Daehak-ro, Yuseong-gu, Daejeon 34141, Republic of Korea.

<sup>c</sup> Center for Advanced Specialty Chemicals, Korea Research Institute of Chemical Technology (KRICT), Ulsan 44412, Republic of Korea.

\*Corresponding author.

**Table of contents**

|                                                                                                             |      |
|-------------------------------------------------------------------------------------------------------------|------|
| <b>Figure S1.</b> Relationship between optical density and dry cell weight in different culture conditions. | S3   |
| <b>Synthesis and characterization.</b>                                                                      | S3-7 |
| <b>Figure S2.</b> <sup>1</sup> H NMR spectrum of M2 in CDCl <sub>3</sub> .                                  |      |
| S8                                                                                                          |      |
| <b>Figure S3.</b> <sup>13</sup> C NMR spectrum of M2 in CDCl <sub>3</sub> .                                 |      |
| S8                                                                                                          |      |
| <b>Figure S4.</b> <sup>1</sup> H NMR spectrum of TPE-TPA-V in CD <sub>2</sub> Cl <sub>2</sub> .             |      |
| S9                                                                                                          |      |
| <b>Figure S5.</b> <sup>13</sup> C NMR spectrum of TPE-TPA-V in CD <sub>2</sub> Cl <sub>2</sub> .            |      |
| S9                                                                                                          |      |
| <b>Figure S6.</b> <sup>1</sup> H NMR spectrum of E1 in CD <sub>2</sub> Cl <sub>2</sub> .                    |      |
| S10                                                                                                         |      |
| <b>Figure S7.</b> <sup>13</sup> C NMR spectrum of E1 in CD <sub>2</sub> Cl <sub>2</sub> .                   |      |
| S10                                                                                                         |      |
| <b>Figure S8.</b> <sup>1</sup> H NMR spectrum of E2 in CD <sub>2</sub> Cl <sub>2</sub> .                    |      |
| S11                                                                                                         |      |
| <b>Figure S9.</b> <sup>13</sup> C NMR spectrum of E2 in CD <sub>2</sub> Cl <sub>2</sub> .                   |      |
| S11                                                                                                         |      |
| <b>Figure S10.</b> MALDI-TOF mass spectrum of M2.                                                           |      |
| S12                                                                                                         |      |
| <b>Figure S11.</b> MALDI-TOF mass spectrum of TPE-TPA-V.                                                    |      |
| S12                                                                                                         |      |
| <b>Figure S12.</b> MALDI-TOF mass spectrum of E1.                                                           | S13  |
| <b>Figure S13.</b> MALDI-TOF mass spectrum of E2.                                                           | S14  |
| <b>Figure S14.</b> Elemental analysis of M2.                                                                |      |
| S15                                                                                                         |      |
| <b>Figure S15.</b> Elemental analysis of E1.                                                                |      |
| S15                                                                                                         |      |

**Figure S16.** Elemental analysis of E2.

S16

**TDDFT calculation results** of M2, E1, and E2.

S16-

33

Experimental details of harvest, extraction, and FAME analysis.

S33

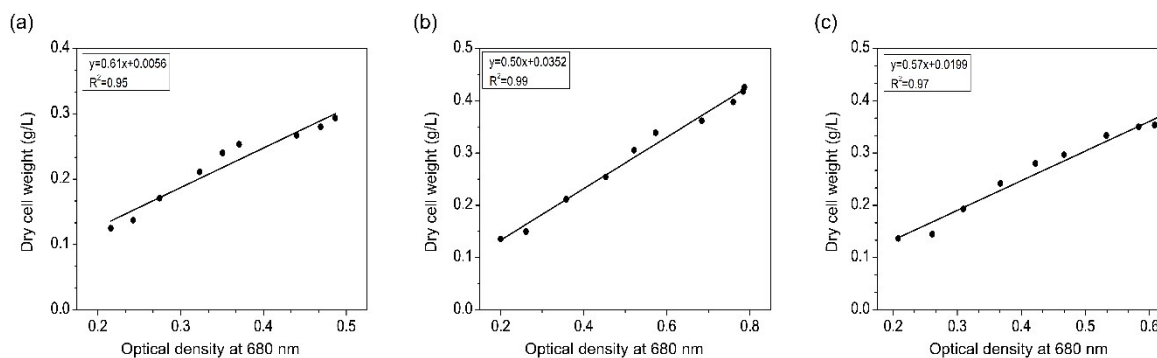

**Fig S1.** Relationship between optical density and dry cell weight in different culture conditions.

### Synthesis and characterization.

A series of diketopyrrolopyrrole (DPP) compounds and triphenylamine (TPA) derivatives (MTPA-BO, TPE-TPA-CHO, TPE-TPA-V) were synthesized efficiently according to literature procedures. All other reagents were purchased from commercial suppliers and used as received without further purification. Synthesized DPP compounds were characterized using  $^1\text{H}$  and  $^{13}\text{C}$  NMR, elemental analysis (EA), and matrix-assisted laser desorption/ionization time-of-flight (MALDI-TOF) mass analysis.  $^1\text{H}$  and  $^{13}\text{C}$  NMR spectra were recorded on a Bruker Avance III 500 spectrometer at 500 MHz in chloroform-*d* or dichloromethane-*d* with tetramethylsilane (TMS) as an internal standard. EA was performed with a Thermo Scientific Flash EA 1112 elemental analyzer.

MALDI-TOF mass spectra were recorded on an Applied Biosystems Voyager-DE STR Biospectrometry Workstation using cyano-4-hydroxycinnamic acid (CHCA) as a matrix.

*3-(4'-(bis(4-methoxyphenyl)amino)-[1,1'-biphenyl]-4-yl)-6-(4-bromophenyl)-2,5-dihexyl-2,5-dihydropyrrolo[3,4-c]pyrrole-1,4-dione (M2).*

A mixture of Pd(PPh<sub>3</sub>)<sub>4</sub> (100 mg, 0.091 mmol), D6C (0.28 g, 0.46 mmol), and MTPA-BO (480 mg, 1.38 mmol) in dry THF (40 mL) was stirred for 30 min at room temperature under a nitrogen atmosphere. After increasing the temperature of the mixture to 60 °C, an aqueous solution of K<sub>2</sub>CO<sub>3</sub> (3.65 M, 5 mL) was added dropwise and the resulting mixture was maintained at this temperature for 16 h. The reaction mixture was then poured into brine water and extracted with CH<sub>2</sub>Cl<sub>2</sub>. The combined organic layers were dried over anhydrous MgSO<sub>4</sub> and then evaporated to dryness. The crude product was purified by column chromatography using CH<sub>2</sub>Cl<sub>2</sub>:methanol (400:1, v/v) as the eluent to produce dark red crystals of isolated **M2** (340 mg, 70% yield). <sup>1</sup>H NMR (500 MHz, CDCl<sub>3</sub>), δ (ppm): 7.88–7.90 (d, *J* = 8.5 Hz, 4H), 7.69–7.71 (d, *J* = 8.5 Hz, 4H), 7.48 (d, *J* = 2 Hz, 2H), 7.47 (d, *J* = 2 Hz, 2H), 7.09–7.13 (m, 8H), 6.99–7.00 (t, *J* = 1.5 Hz, 4H), 6.85–6.88 (m, 8H), 3.79–3.82 (m, 16H), 0.82–1.69 (m, 22H). <sup>13</sup>C NMR (125 MHz, CDCl<sub>3</sub>), δ (ppm): 163.12, 156.35, 149.13, 148.22, 143.61, 140.72, 131.43, 129.42, 127.76, 127.14, 126.71, 126.30, 120.34, 114.99, 109.90, 55.71, 42.35, 31.45, 29.67, 26.65, 22.69, 14.17. MALDI-TOF MS: *m/z* calcd for C<sub>70</sub>H<sub>71</sub>N<sub>4</sub>O<sub>62</sub> (100%, [(M+H)<sup>+</sup>]), 1063.53; found 1063.5001. Elemental analysis: calcd for C<sub>70</sub>H<sub>70</sub>N<sub>4</sub>O<sub>6</sub>: C, 79.07; H, 6.64; N, 5.27; O, 9.03. Found: C, 79.05; H, 6.74; N, 5.26; O, 8.98.

4'-(1,2,2-triphenylvinyl)-N-(4'-(1,2,2-triphenylvinyl)-[1,1'-biphenyl]-4-yl)-N-(4-vinylphenyl)-[1,1'-biphenyl]-4-amine (TPE-TPA-V).

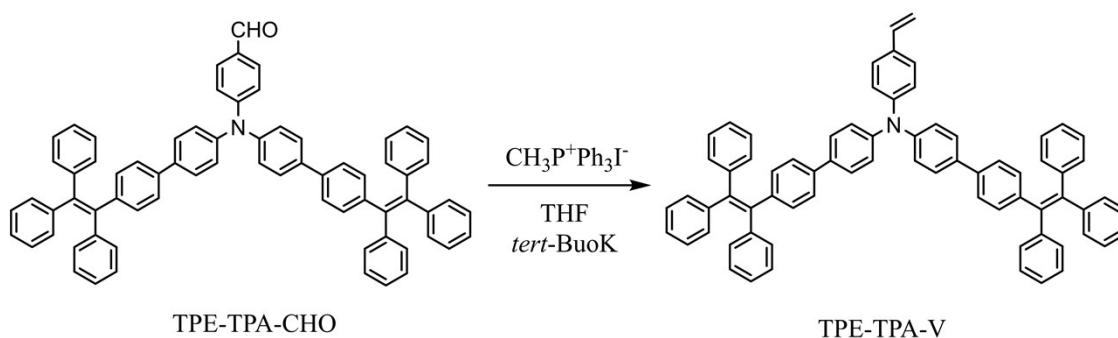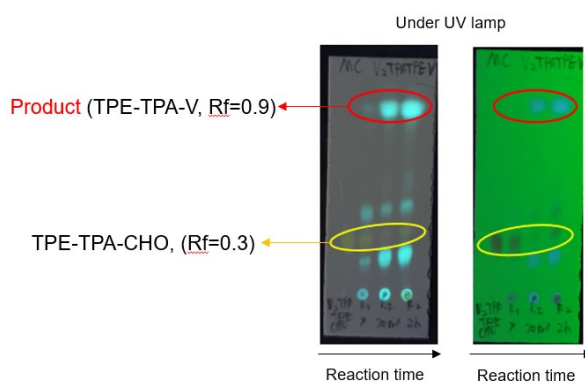

A mixture of methyltriphenylphosphonium iodide (3.63g, 9 mmol), and the TPE-TPA-CHO (5.4g, 6.0 mmol) were solved in anhydrous THF (40 mL). Then the mixtures were stirred under nitrogen atmosphere at 40°C. After 30 min, potassium *tert*-butoxide (1.05g, 9 mmol) was added and the mixture was stirred for another 4 h. The mixture was extracted with dichloromethane and washed several times with brine. The combined organic layer

was dried over anhydrous  $\text{MgSO}_4$  and concentrated using a rotary evaporator. The crude product was purified by column chromatography using *n*-hexane: $\text{CH}_2\text{Cl}_2$  (3:1, *v/v*) as the eluent to produce yellow flake ( $R_f=0.9$ ) of isolated **TPE-TPA-V** (3.7 g, 69% yield).  $^1\text{H}$  NMR (500 MHz,  $\text{CD}_2\text{Cl}_2$ ),  $\delta$  (ppm): 7.37-7.39 (d,  $J=9$  Hz, 3H), 7.27 (d,  $J=8.5$  Hz, 4H), 7.23 (d,  $J=9$  Hz, 2H), 7.07-6.88 (m, 41H), 6.60 (dd,  $J=11, 6.5$  Hz, 1H), 5.56 (d,  $J=17.5$  Hz, 1H), 5.09 (d,  $J=11$  Hz, 1H).  $^{13}\text{C}$  NMR (125 MHz,  $\text{CDCl}_3$ ),  $\delta$  (ppm): 147.62, 147.23, 144.40, 144.34, 143.01, 141.65, 141.17, 138.74, 136.70, 135.44, 132.93, 132.24, 131.82, 131.75, 128.28, 128.21, 128.16, 128.03, 127.65, 127.02, 126.98, 126.92, 126.14, 124.89, 124.57, 112.72. MALDI-TOF MS:  $m/z$  calcd for  $\text{C}_{72}\text{H}_{53}\text{N}$  (100%,  $[\text{M}^+]$ ), 931.42; found 931.7560.

*(E)*-3-(4-(4-(bis(4'-(1,2,2-triphenylvinyl)-[1,1'-biphenyl]-4-yl)amino)styryl)phenyl)-6-(4-bromophenyl)-2,5-dihexyl-2,5-dihydropyrrolo[3,4-*c*]pyrrole-1,4-dione (**E1**).

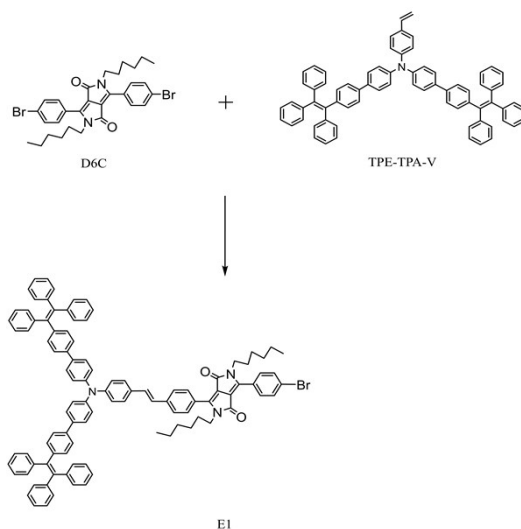

A mixture of **D6C** (0.75 g, 1.23 mmol), **TPE-TPA-V** (1.15g, 1.23 mmol),  $\text{Pd}(\text{OAc})_2$  (111.5mg, 0.5 mmol) tetrabutylammonium bromide (275mg, 0.85mmol) were dissolved in 20mL anhydrous DMF under  $\text{N}_2$  atmosphere and stirred at 100 °C. Then,  $\text{K}_2\text{CO}_3$  (0.2g, 2mmol) was added to the reaction mixture and stirred for 12h at 100 °C. The mixture was extracted with ethyl acetate and washed several times with brine. The combined organic layer was dried over anhydrous  $\text{MgSO}_4$  and concentrated using a rotary evaporator. The crude product was purified by column chromatography using *n*-hexane: $\text{CH}_2\text{Cl}_2$  (1:3, *v/v*) as the eluent to produce dark red flake ( $R_f=0.8$ ) of isolated **E1** (0.45 g, 25% yield).  $^1\text{H}$  NMR (500 MHz,  $\text{CD}_2\text{Cl}_2$ ),  $\delta$  (ppm): 7.75-7.76 (d,  $J=8.5$  Hz, 2H), 7.57-7.63 (m, 6H), 7.38-7.42 (t,  $J=10$  Hz, 6H), 7.27-7.29 (d,  $J=8.5$  Hz, 4H), 7.17 (s, 1H) 7.14 (s, 1H), 6.95-7.07

(m, 40H), 3.68 (t,  $J = 7.5$  Hz, 2H), 3.64 (t,  $J = 8$  Hz, 2H), 1.47-1.51 (m, 4H), 1.12-1.19 (m, 12H), 0.74-0.76 (t,  $J = 7$  Hz, 6H).  $^{13}\text{C}$  NMR (125 MHz,  $\text{CD}_2\text{Cl}_2$ ),  $\delta$  (ppm): 163.09, 162.80, 148.97, 148.07, 147.03, 146.75, 144.39, 144.34, 143.10, 141.69, 141.15, 138.70, 135.81, 132.62, 132.27, 131.82, 131.75, 130.90, 130.76, 129.75, 128.32, 128.30, 128.22, 128.17, 128.12, 127.98, 127.34, 127.00, 126.94, 126.40, 126.18, 125.72, 125.25, 124.15, 110.83, 110.21, 42.45, 42.20, 31.78, 29.89, 26.89, 26.85, 23.03, 14.28. MALDI-TOF MS:  $m/z$  calcd for  $\text{C}_{102}\text{H}_{86}\text{BrN}_3\text{O}_2$  (100%,  $[(\text{M}+2\text{H})^{2+}]$ ), 1465.59; found 1465.4246. Elemental analysis: calcd for  $\text{C}_{102}\text{H}_{86}\text{BrN}_3\text{O}_2$ : C, 83.58; H, 5.91; Br, 5.45; N, 2.87; O, 2.18. Found: C, 83.38; H, 5.94; N, 2.80; O, 2.29.

3,6-bis(4-((*E*)-4-(bis(4'-(1,2,2-triphenylvinyl)-[1,1'-biphenyl]-4-yl)amino)styryl)phenyl)-2,5-dihexyl-2,5-dihydropyrrolo[3,4-*c*]pyrrole-1,4-dione (**E2**).

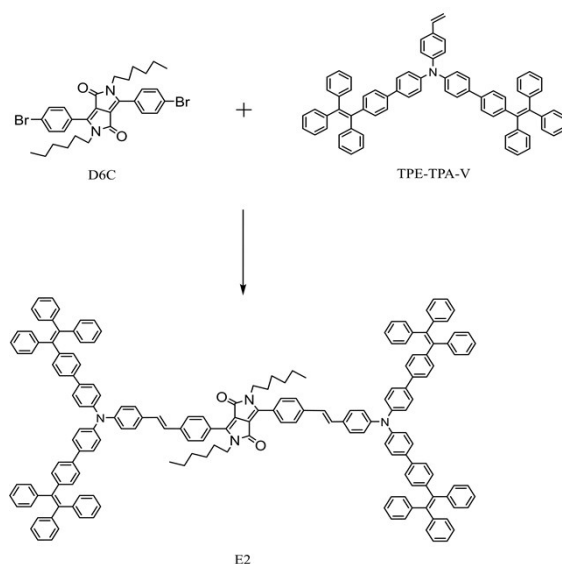

A mixture of D6C (0.38 g, 0.62 mmol), TPE-TPA-V (1.15g, 1.23 mmol),  $\text{Pd}(\text{OAc})_2$  (111.5mg, 0.5 mmol) tetrabutylammonium bromide (275mg, 0.85mmol) were dissolved in 20mL anhydrous DMF under  $\text{N}_2$  atmosphere and stirred at 100 °C. Then,  $\text{K}_2\text{CO}_3$  (0.2g, 2mmol) was added to the reaction mixture and stirred for 24h at 100 °C. The mixture was extracted with ethyl acetate and washed several times with brine. The combined organic layer was dried over anhydrous  $\text{MgSO}_4$  and concentrated using a rotary evaporator. The crude product was purified by column chromatography using *n*-hexane: $\text{CH}_2\text{Cl}_2$  (1:3, v/v) as the eluent to produce dark red flake ( $R_f=0.8$ ) of isolated **E2** (0.63 g, 44% yield).  $^1\text{H}$  NMR (500 MHz,  $\text{CD}_2\text{Cl}_2$ ),  $\delta$  (ppm): 7.76 (d,  $J = 8$  Hz, 4H), 7.57

(d,  $J = 8$  Hz, 4H), 7.38-7.42 (t,  $J = 8.5$  Hz, 12H), 7.27-7.29 (d,  $J = 8.5$  Hz, 8H), 7.23 (s, 2H) 7.22 (s, 2H), 6.65-7.08 (m, 80H), 3.70 (t,  $J = 7$  Hz, 4H), 1.50-1.53 (m, 4H), 1.15-1.18 (m, 12H), 0.74-0.77 (t,  $J = 7$  Hz, 6H).  $^{13}\text{C}$  NMR (125 MHz,  $\text{CD}_2\text{Cl}_2$ ),  $\delta$  (ppm): 163.12, 148.08, 148.04, 147.04, 144.39, 144.34, 143.10, 141.68, 141.15, 140.91, 138.70, 135.78, 132.27, 131.82, 131.75, 130.76, 129.74, 128.30, 128.22, 128.17, 128.12, 127.53, 127.15, 127.02, 126.99, 126.94, 126.48, 126.18, 125.23, 124.19, 110.47, 42.44, 31.82, 29.92, 26.92, 23.05, 14.30. MALDI-TOF MS:  $m/z$  calcd for  $\text{C}_{174}\text{H}_{140}\text{N}_4\text{O}_2$  (100%,  $[(\text{M}+2\text{H})^{2+}]$ ), 2317.08; found 2317.0234. Elemental analysis: calcd for  $\text{C}_{174}\text{H}_{138}\text{N}_4\text{O}_2$ : C, 90.20; H, 6.00; N, 2.42; O, 1.38. Found: C, 89.94; H, 6.05; N, 2.41; O, 1.50.

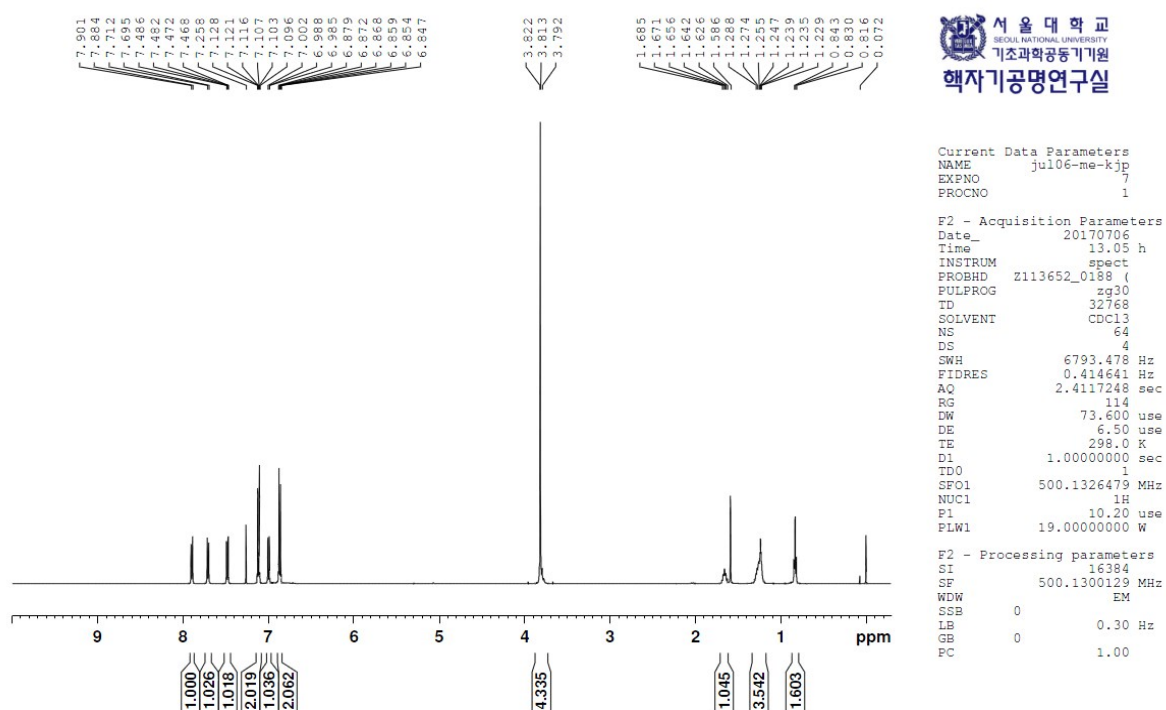

Figure S2  $^1\text{H}$  NMR spectrum of M2 in  $\text{CDCl}_3$ .





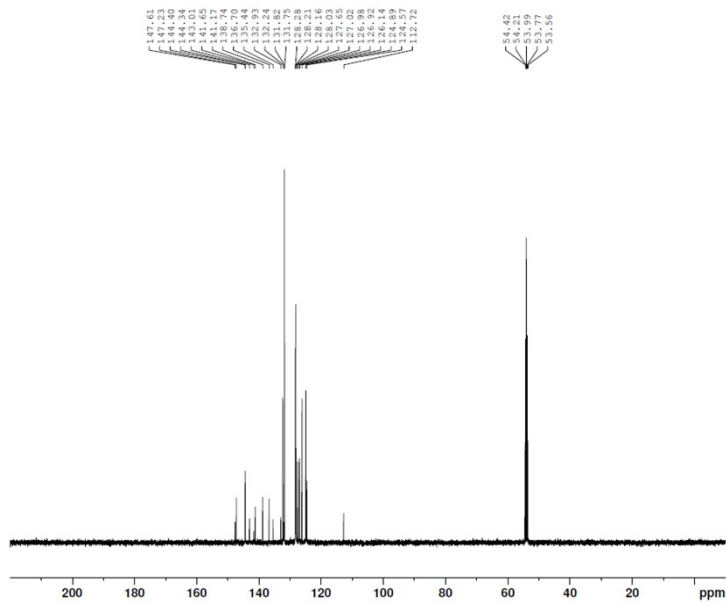

Figure S5  $^{13}\text{C}$  NMR spectrum of TPE-TPA-V in  $\text{CD}_2\text{Cl}_2$ .

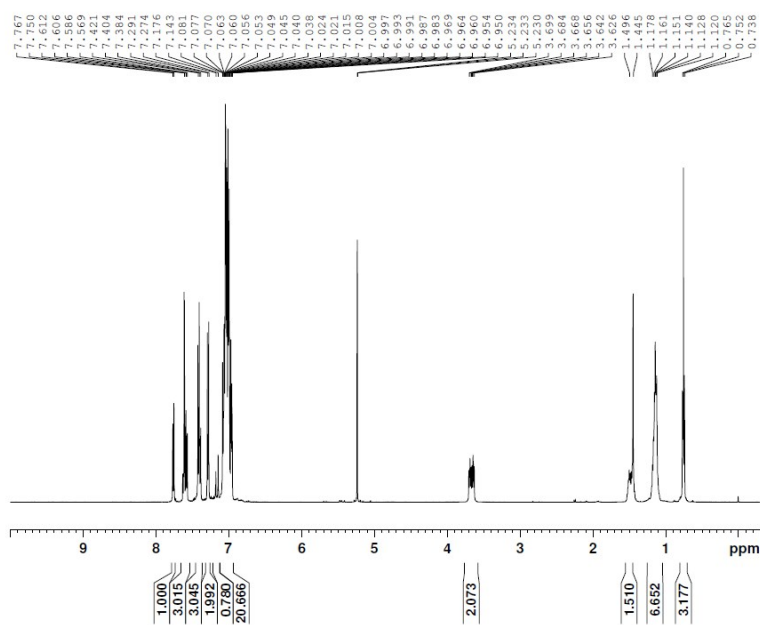

Figure S6  $^1\text{H}$  NMR spectrum of E1 in  $\text{CD}_2\text{Cl}_2$ .

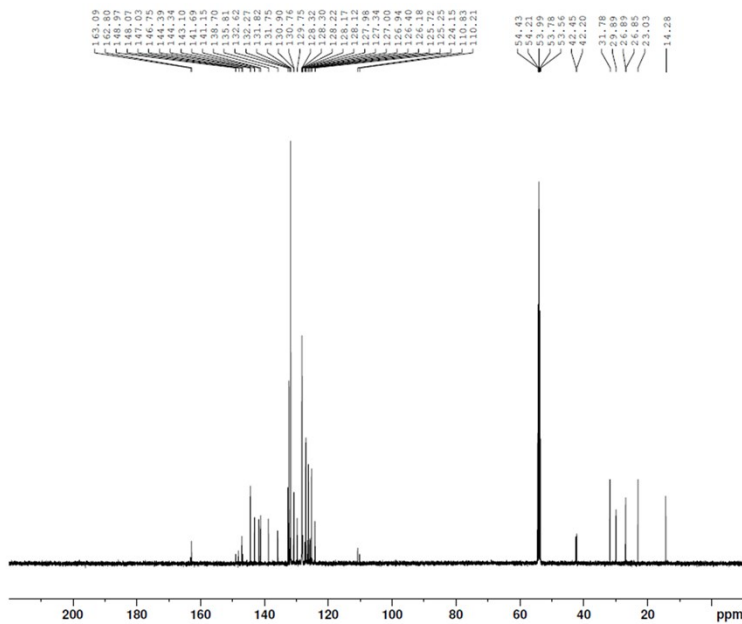

서울대학교  
SEOUL NATIONAL UNIVERSITY  
기초과학공동연구원  
핵자기공명연구실

```
Current Data Parameters
NAME      mar19-me-kjp
EXPNO    5
PROCNO   1

F2 - Acquisition Parameters
Date_    20200320
Time     10.27 h
INSTRUM  spect
PROBHD   Z113652_0188 (
PULPROG  zgpg
TD        32768
SOLVENT  CD2Cl2
NS        3072
DS        4
SWH       29761.904 Hz
FIDRES    1.816532 Hz
AQ        0.5505024 sec
RG         2050
DW        16.800 usec
DE        6.50 usec
TE        298.0 K
D1        2.00000000 sec
D11       0.03000000 sec
TDO       1
SF01      125.7709936 MHz
NUC1      13C
P1        10.00 usec
PLM1      90.0000000 W
SF02      500.1320005 MHz
NUC2      1H
CPDPRG2   waltz16
PCPD2     80.00 usec
PLM2      19.0000000 W
PLM12     0.30886999 W

F2 - Processing parameters
SI        16384
SF        125.7571717 MHz
WDW       EM
SSB       0
LB        0.50 Hz
GB        0
PC        1.40
```

Figure S7  $^{13}\text{C}$  NMR spectrum of E1 in  $\text{CD}_2\text{Cl}_2$ .

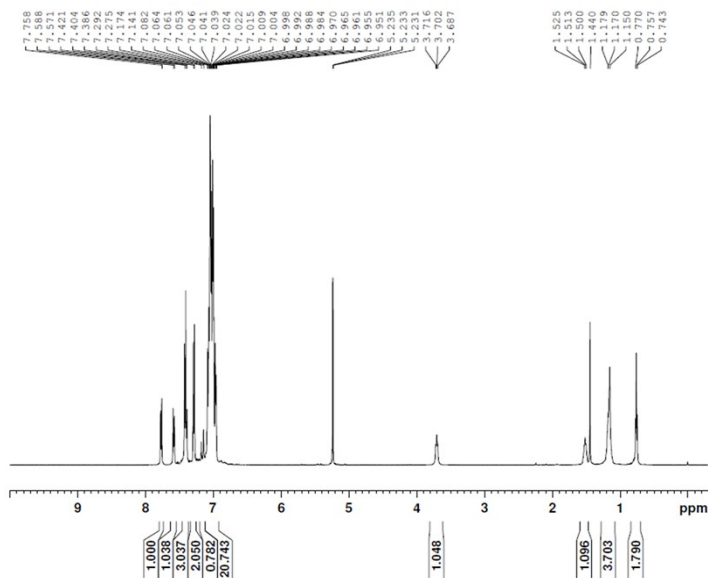

서울대학교  
SEOUL NATIONAL UNIVERSITY  
기초과학공동연구원  
핵자기공명연구실

```
Current Data Parameters
NAME      mar19-mo-kjp
EXPNO    4
PROCNO   1

F2 - Acquisition Parameters
Date_    20200319
Time     16.59 h
INSTRUM  spect
PROBHD   Z113652_0188 (
PULPROG  zg30
TD        32768
SOLVENT  CD2Cl2
NS        32
DS        4
SWH       7462.687 Hz
FIDRES    0.455486 Hz
AQ        2.1954560 sec
RG         161
DW        67.000 usec
DE        6.50 usec
TE        298.0 K
D1        1.00000000 sec
D11       0.03000000 sec
TDO       1
SF01      500.1328137 MHz
NUC1      1H
P1        10.20 usec
PLM1      19.00000000 W

F2 - Processing parameters
SI        16384
SF        500.1300628 MHz
WDW       EM
SSB       0
LB        0.30 Hz
GB        0
PC        1.00
```

Figure S8  $^1\text{H}$  NMR spectrum of E2 in  $\text{CD}_2\text{Cl}_2$ .

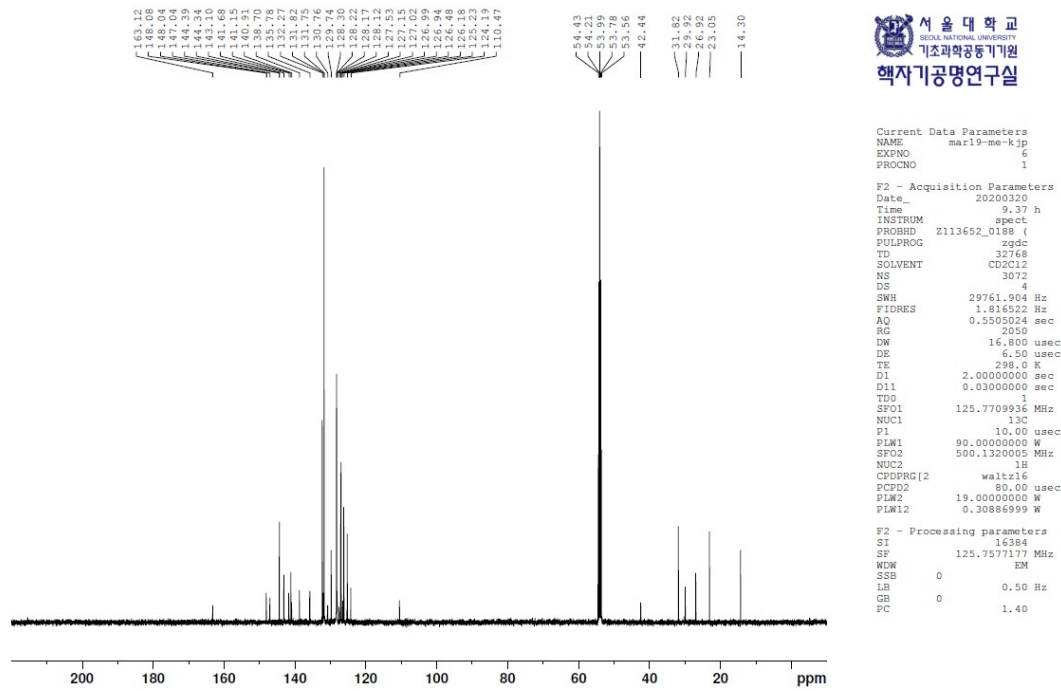

Figure S9 <sup>13</sup>C NMR spectrum of E2 in CD<sub>2</sub>Cl<sub>2</sub>.

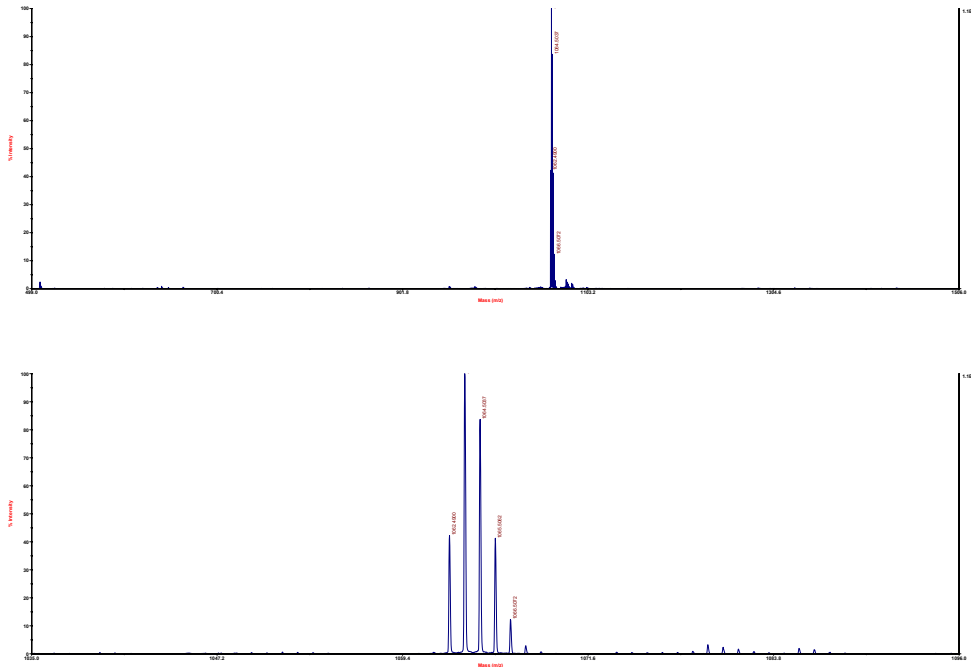

Figure S10. MALDI-TOF mass spectrum of M2.

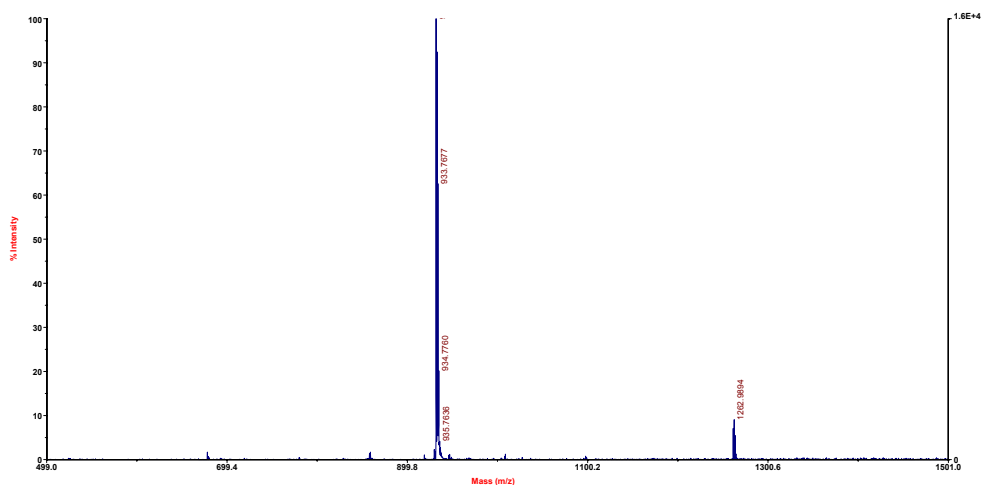

Figure S11. MALDI-TOF mass spectrum of TPE-TPA-V.

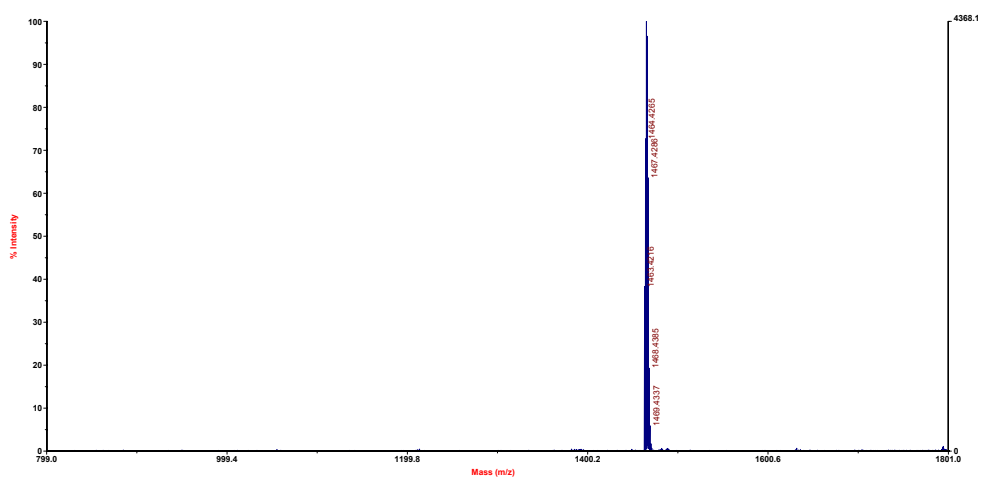

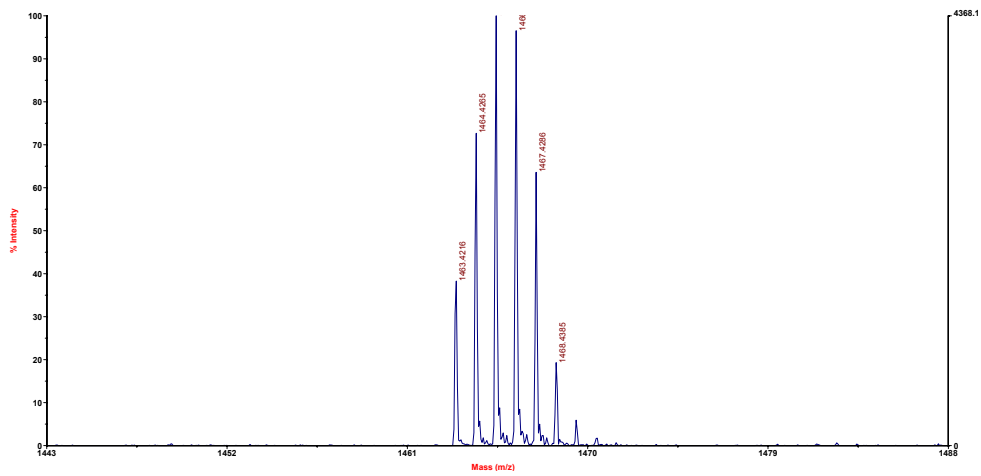

Figure S12. MALDI-TOF mass spectrum of E1.

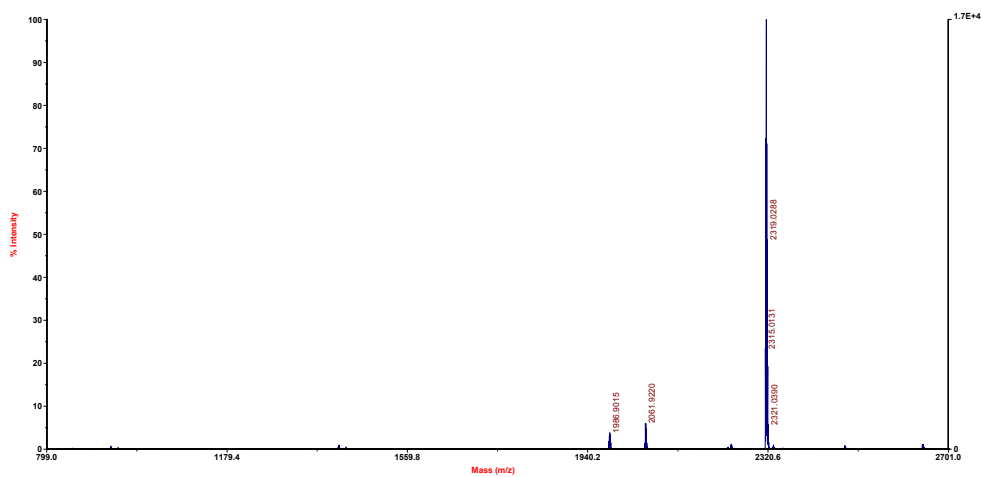

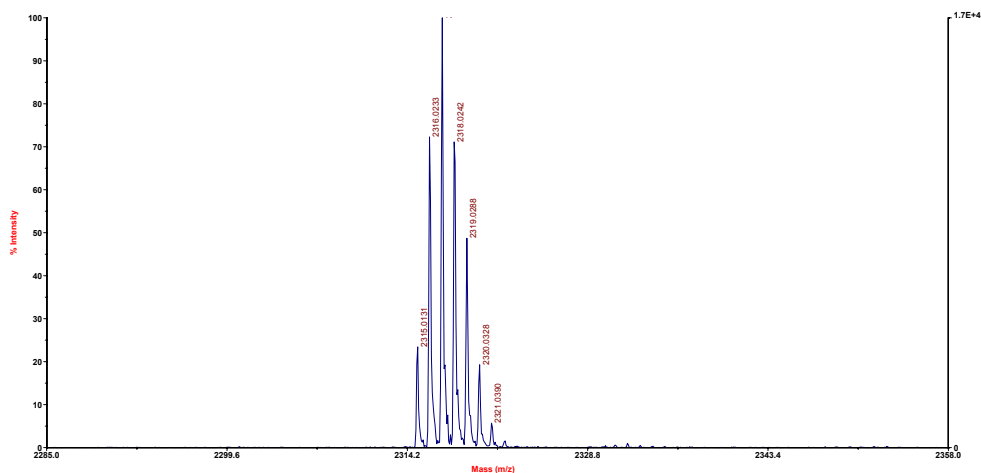

Figure S13. MALDI-TOF mass spectrum of E2.

## 서울대학교 기초과학공동기기원

SEOUL NATIONAL UNIVERSITY  
NATIONAL CENTER FOR INTER-UNIVERSITY FACILITIES

Eager 300 S/W Validation

본 공동기기원의 분석결과는 광고, 선전, 홍보 및 법적 수단으로 이용될 수 없습니다.

Operator ID: SNU-EA2000  
Company name: Thermo Fisher

( Unit: wt%)

| Sample name | Nitrogen | Carbon  | Hydrogen | Sulphur | Oxygen |
|-------------|----------|---------|----------|---------|--------|
| M2          | 5.2562   | 79.0506 | 6.7356   | n.d.    | 8.9788 |

\* n.d. : not detected

Figure S14. Elemental analysis of M2.

## 서울대학교 기초과학공동기기원

\* n.d. : not detected

SEOUL NATIONAL UNIVERSITY  
NATIONAL CENTER FOR INTER-UNIVERSITY FACILITIES  
Eager 300 S/W Validation

본 공동기기원의 분석결과는 광고, 선전, 홍보 및 법적 수단으로 이용될 수 없습니다.

Operator ID: SNU-EA2000  
Company name: Thermo Fisher

( Unit: wt%)

| Sample name | Nitrogen | Carbon  | Hydrogen | Oxygen |
|-------------|----------|---------|----------|--------|
| E1          | 2.8075   | 83.3826 | 5.9446   | 2.2941 |

\* n.d. : not detected

Figure S15. Elemental analysis of E1.

## 서울대학교 기초과학공동기기원

SEOUL NATIONAL UNIVERSITY  
NATIONAL CENTER FOR INTER-UNIVERSITY FACILITIES  
Eager 300 S/W Validation

본 공동기기원의 분석결과는 광고, 선전, 홍보 및 법적 수단으로 이용될 수 없습니다.

Operator ID: SNU-EA2000  
Company name: Thermo Fisher

( Unit: wt%)

| Sample name | Nitrogen | Carbon  | Hydrogen | Oxygen |
|-------------|----------|---------|----------|--------|
| E2          | 2.4065   | 89.9376 | 6.0526   | 1.4972 |

\* n.d. : not detected

Figure S16. Elemental analysis of E2.

TDDFT Calculation results of M2, E1, and E2.



- **Excitation energies and oscillator strengths of M2 (B3LYP functional with 6-31G(d,p) basis set of Gaussian 16 software package).**

➤

Excited State 1: Triplet-A 1.1659 eV 1063.44 nm f=0.0000 <S\*\*2>=2.000  
 281 -> 284 0.43501  
 283 -> 284 0.55763  
 281 <- 284 0.10606  
 283 <- 284 0.10803

Excited State 2: Triplet-A 2.1980 eV 564.07 nm f=0.0000 <S\*\*2>=2.000  
 282 -> 284 0.65891  
 283 -> 285 -0.17747

This state for optimization and/or second-order correction.

Total Energy, E(TD-HF/TD-KS) = -3380.00014858

Copying the excited state density for this state as the 1-particle RhoCI density.

Excited State 3: Singlet-A 2.1984 eV 563.97 nm f=1.2604 <S\*\*2>=0.000  
 283 -> 284 0.69900

Excited State 4: Triplet-A 2.2381 eV 553.96 nm f=0.0000 <S\*\*2>=2.000  
 281 -> 284 0.52168  
 282 -> 285 0.13252  
 283 -> 284 -0.41494  
 283 -> 286 -0.10095

Excited State 5: Singlet-A 2.3838 eV 520.12 nm f=0.0014 <S\*\*2>=0.000  
282 -> 284 0.70495

Excited State 6: Singlet-A 2.6255 eV 472.24 nm f=0.1578 <S\*\*2>=0.000  
281 -> 284 0.69798

Excited State 7: Triplet-A 2.6981 eV 459.52 nm f=0.0000 <S\*\*2>=2.000  
275 -> 284 -0.10072  
276 -> 284 -0.21630  
278 -> 284 0.12503  
281 -> 285 0.22450  
281 -> 293 -0.13280  
282 -> 284 0.20590  
283 -> 285 0.49762

Excited State 8: Triplet-A 2.9559 eV 419.45 nm f=0.0000 <S\*\*2>=2.000  
277 -> 284 -0.15245  
278 -> 285 -0.11488  
281 -> 284 -0.17775  
282 -> 285 0.40221  
282 -> 293 0.13123  
283 -> 284 0.13552  
283 -> 286 -0.33427  
283 -> 288 0.11561

Excited State 9: Triplet-A 2.9917 eV 414.43 nm f=0.0000 <S\*\*2>=2.000

276 -> 284 0.47987

281 -> 285 -0.23403

282 -> 284 0.12037

282 -> 286 -0.23628

283 -> 285 0.21314

283 -> 293 0.16217

Excited State 10: Triplet-A 3.1330 eV 395.74 nm f=0.0000 <S\*\*2>=2.000

273 -> 284 -0.15066

275 -> 284 -0.24244

276 -> 284 0.38181

278 -> 284 0.15418

281 -> 285 0.27994

282 -> 286 0.24220

283 -> 293 -0.14705

Excited State 11: Triplet-A 3.2072 eV 386.58 nm f=0.0000 <S\*\*2>=2.000

265 -> 284 -0.12141

274 -> 284 0.26162

277 -> 284 0.31175

279 -> 284 -0.21196

280 -> 284 -0.12462

|            |         |
|------------|---------|
| 281 -> 286 | 0.20248 |
| 282 -> 285 | 0.16881 |
| 282 -> 287 | 0.14909 |
| 282 -> 289 | 0.11784 |
| 283 -> 298 | 0.10926 |

Excited State 12: Triplet-A 3.2274 eV 384.16 nm f=0.0000 <S\*\*2>=2.000

|            |          |
|------------|----------|
| 273 -> 284 | 0.41921  |
| 275 -> 284 | 0.29559  |
| 276 -> 284 | 0.15410  |
| 278 -> 284 | -0.10914 |
| 281 -> 285 | 0.13805  |
| 282 -> 286 | 0.11275  |
| 282 -> 289 | 0.10413  |
| 282 -> 290 | 0.13742  |
| 283 -> 287 | -0.10902 |
| 283 -> 289 | -0.13234 |

Excited State 13: Triplet-A 3.2435 eV 382.25 nm f=0.0000 <S\*\*2>=2.000

|            |          |
|------------|----------|
| 277 -> 284 | 0.11644  |
| 278 -> 290 | 0.10023  |
| 281 -> 290 | -0.23007 |
| 282 -> 289 | -0.11614 |
| 282 -> 290 | 0.32939  |

282 -> 293 0.10606

283 -> 290 0.28917

Excited State 14: Triplet-A 3.2482 eV 381.71 nm f=0.0000 <S\*\*2>=2.000

273 -> 284 -0.15771

275 -> 284 -0.12924

281 -> 285 -0.12716

281 -> 289 0.21723

282 -> 289 0.31018

282 -> 290 0.12205

283 -> 289 -0.24845

283 -> 293 0.11215

Excited State 15: Singlet-A 3.2601 eV 380.30 nm f=0.0003 <S\*\*2>=0.000

276 -> 284 0.62331

283 -> 285 0.29726

Excited State 16: Triplet-A 3.3418 eV 371.01 nm f=0.0000 <S\*\*2>=2.000

273 -> 284 0.23187

276 -> 284 -0.12587

278 -> 284 0.29029

279 -> 284 -0.22251

280 -> 284 0.34450

281 -> 285 -0.14913

282 -> 288 0.10840

283 -> 285 -0.18040

Excited State 17: Singlet-A 3.3555 eV 369.50 nm f=0.0019 <S\*\*2>=0.000

273 -> 284 0.11281

275 -> 284 0.15187

276 -> 284 -0.29394

278 -> 284 -0.13677

280 -> 284 -0.14120

283 -> 285 0.55685

Excited State 18: Triplet-A 3.3850 eV 366.28 nm f=0.0000 <S\*\*2>=2.000

280 -> 284 0.11714

281 -> 288 0.19410

282 -> 287 0.34128

282 -> 288 -0.22106

282 -> 290 0.12719

283 -> 286 -0.13056

283 -> 287 0.17505

283 -> 288 -0.33530

283 -> 290 0.11871

Excited State 19: Triplet-A 3.3908 eV 365.65 nm f=0.0000 <S\*\*2>=2.000

279 -> 284 -0.11461

|            |          |
|------------|----------|
| 280 -> 284 | 0.10159  |
| 281 -> 287 | -0.19552 |
| 281 -> 288 | -0.10355 |
| 282 -> 286 | -0.10967 |
| 282 -> 287 | -0.23400 |
| 282 -> 288 | -0.32098 |
| 282 -> 289 | 0.13168  |
| 283 -> 287 | 0.33272  |
| 283 -> 288 | 0.16387  |
| 283 -> 289 | -0.13547 |

Excited State 20: Singlet-A 3.4319 eV 361.27 nm f=0.0012 <S\*\*2>=0.000

|            |          |
|------------|----------|
| 269 -> 284 | -0.10741 |
| 273 -> 284 | 0.46657  |
| 274 -> 284 | -0.14000 |
| 275 -> 284 | 0.35461  |
| 276 -> 284 | 0.11368  |
| 278 -> 284 | -0.11023 |
| 279 -> 284 | 0.11256  |
| 280 -> 284 | -0.11341 |
| 283 -> 285 | -0.22508 |

Excited State 21: Singlet-A 3.4693 eV 357.37 nm f=0.1762 <S\*\*2>=0.000

|            |          |
|------------|----------|
| 277 -> 284 | -0.11156 |
|------------|----------|

279 -> 284 0.39756  
280 -> 284 0.54112  
282 -> 285 0.14059

Excited State 22: Singlet-A 3.4890 eV 355.35 nm f=0.0353 <S\*\*2>=0.000

273 -> 284 -0.16481  
275 -> 284 -0.12139  
279 -> 284 0.52607  
280 -> 284 -0.38646  
283 -> 285 -0.11452

Excited State 23: Triplet-A 3.5043 eV 353.81 nm f=0.0000 <S\*\*2>=2.000

274 -> 284 0.13835  
277 -> 284 0.16505  
278 -> 284 -0.11745  
279 -> 284 0.44118  
280 -> 284 0.42913

Excited State 24: Triplet-A 3.5418 eV 350.06 nm f=0.0000 <S\*\*2>=2.000

266 -> 284 -0.14767  
270 -> 284 0.21199  
273 -> 284 -0.13953  
275 -> 284 0.10208  
278 -> 284 -0.32936



279 -> 284 -0.31852

280 -> 284 0.34279

Excited State 25: Singlet-A 3.5469 eV 349.56 nm f=0.6860 <S\*\*2>=0.000

277 -> 284 -0.12543

279 -> 284 -0.15747

282 -> 285 0.62904

283 -> 286 -0.14845

Excited State 26: Triplet-A 3.5535 eV 348.91 nm f=0.0000 <S\*\*2>=2.000

266 -> 284 -0.30781

270 -> 284 0.38447

271 -> 284 -0.27956

273 -> 285 0.10438

277 -> 284 0.10792

278 -> 284 0.12993

279 -> 284 0.24596

Excited State 27: Singlet-A 3.6567 eV 339.06 nm f=0.0019 <S\*\*2>=0.000

273 -> 284 -0.15552

278 -> 284 -0.43349

281 -> 285 0.46302

282 -> 286 0.14713

283 -> 285 -0.10635

Excited State 28: Triplet-A 3.6602 eV 338.74 nm f=0.0000 <S\*\*2>=2.000

|            |          |
|------------|----------|
| 269 -> 284 | 0.57292  |
| 270 -> 285 | 0.12027  |
| 272 -> 284 | -0.10636 |
| 283 -> 291 | -0.10890 |
| 283 -> 292 | -0.19079 |

Excited State 29: Triplet-A 3.6690 eV 337.93 nm f=0.0000 <S\*\*2>=2.000

|            |          |
|------------|----------|
| 266 -> 284 | -0.19515 |
| 277 -> 284 | -0.12692 |
| 281 -> 286 | 0.12874  |
| 282 -> 285 | 0.36094  |
| 283 -> 286 | 0.37826  |
| 283 -> 288 | -0.16490 |
| 283 -> 291 | -0.11960 |

Excited State 30: Triplet-A 3.6850 eV 336.45 nm f=0.0000 <S\*\*2>=2.000

|            |          |
|------------|----------|
| 266 -> 284 | 0.16538  |
| 270 -> 284 | 0.12249  |
| 275 -> 290 | -0.11171 |
| 278 -> 290 | -0.11017 |
| 280 -> 297 | -0.18470 |
| 281 -> 293 | 0.11200  |

|            |          |
|------------|----------|
| 282 -> 285 | 0.15703  |
| 282 -> 293 | -0.13617 |
| 282 -> 298 | -0.10808 |
| 282 -> 299 | -0.10527 |
| 283 -> 285 | 0.10658  |
| 283 -> 291 | 0.14338  |

Excited State 31: Singlet-A 3.6912 eV 335.90 nm f=0.0429 <S\*\*2>=0.000

|            |          |
|------------|----------|
| 274 -> 284 | 0.12608  |
| 277 -> 284 | 0.61925  |
| 279 -> 284 | 0.10477  |
| 282 -> 285 | 0.13811  |
| 283 -> 286 | -0.18376 |

Excited State 32: Singlet-A 3.7536 eV 330.31 nm f=0.0382 <S\*\*2>=0.000

|            |          |
|------------|----------|
| 281 -> 288 | 0.14472  |
| 282 -> 285 | -0.13680 |
| 282 -> 287 | 0.37520  |
| 282 -> 288 | -0.10752 |
| 283 -> 286 | -0.34818 |
| 283 -> 288 | -0.36826 |

Excited State 33: Singlet-A 3.7617 eV 329.60 nm f=0.0074 <S\*\*2>=0.000

|            |          |
|------------|----------|
| 278 -> 284 | -0.16368 |
|------------|----------|

281 -> 287 -0.17420  
282 -> 286 -0.21403  
282 -> 287 -0.12806  
282 -> 288 -0.33029  
283 -> 287 0.47904

Excited State 34: Singlet-A 3.7869 eV 327.40 nm f=0.0022 <S\*\*2>=0.000

278 -> 284 0.47837  
281 -> 285 0.47089

Excited State 35: Singlet-A 3.8064 eV 325.73 nm f=0.0139 <S\*\*2>=0.000

266 -> 284 0.45955  
270 -> 284 -0.36292  
271 -> 284 0.23165  
274 -> 284 0.11117  
277 -> 284 -0.13754

Excited State 36: Singlet-A 3.8896 eV 318.76 nm f=0.3687 <S\*\*2>=0.000

266 -> 284 0.13229  
277 -> 284 0.12497  
282 -> 285 0.13627  
282 -> 287 0.14203  
283 -> 286 0.51526  
283 -> 288 -0.34869

Excited State 37: Singlet-A 3.9719 eV 312.15 nm f=0.0058 <S\*\*2>=0.000

269 -> 284 0.48880

272 -> 284 -0.11144

283 -> 289 0.10541

283 -> 291 0.21035

283 -> 292 0.32594

Excited State 38: Singlet-A 3.9864 eV 311.02 nm f=0.0118 <S\*\*2>=0.000

266 -> 284 0.36210

270 -> 284 0.24891

271 -> 284 -0.21679

281 -> 291 -0.10337

283 -> 291 -0.35142

283 -> 292 0.19440

Excited State 39: Singlet-A 4.0176 eV 308.60 nm f=0.1202 <S\*\*2>=0.000

266 -> 284 -0.12207

274 -> 284 0.57700

275 -> 284 0.19273

277 -> 284 -0.13131

281 -> 286 -0.10386

282 -> 289 -0.10718

283 -> 290 0.12910

|                   |           |           |           |          |              |
|-------------------|-----------|-----------|-----------|----------|--------------|
| Excited State 40: | Singlet-A | 4.0294 eV | 307.70 nm | f=0.0241 | <S**2>=0.000 |
| 273 -> 284        | -0.21324  |           |           |          |              |
| 275 -> 284        | 0.27585   |           |           |          |              |
| 281 -> 285        | -0.14770  |           |           |          |              |
| 281 -> 289        | 0.10202   |           |           |          |              |
| 282 -> 286        | 0.37083   |           |           |          |              |
| 282 -> 288        | -0.18496  |           |           |          |              |
| 282 -> 289        | 0.14015   |           |           |          |              |
| 282 -> 290        | 0.14515   |           |           |          |              |
| 283 -> 289        | -0.26466  |           |           |          |              |

- **Excitation energies and oscillator strengths of E1 (B3LYP functional with 6-31G(d,p) basis set of Gaussian 16 software package).**

Excited State 1: Singlet-A 2.0933 eV 592.29 nm f=1.1528 <S\*\*2>=0.000

385 -> 386 0.70194

This state for optimization and/or second-order correction.

Total Energy, E(TD-HF/TD-DFT) = -6825.17383461

Copying the excited state density for this state as the 1-particle RhoCI density.

Excited State 2: Singlet-A 2.4485 eV 506.38 nm f=0.4001 <S\*\*2>=0.000

384 -> 386 0.69770

385 -> 387 -0.10097

Excited State 3: Singlet-A 2.6870 eV 461.42 nm f=0.0063 <S\*\*2>=0.000

383 -> 386 0.70466

Excited State 4: Singlet-A 2.7741 eV 446.94 nm f=0.0217 <S\*\*2>=0.000

382 -> 386 0.69102

Excited State 5: Singlet-A 2.9762 eV 416.58 nm f=0.5478 <S\*\*2>=0.000

385 -> 387 0.67548

Excited State 6: Singlet-A 3.0166 eV 411.01 nm f=0.7490 <S\*\*2>=0.000

384 -> 388 0.17361

385 -> 388 0.66596

385 -> 390 -0.10284

Excited State 7: Singlet-A 3.1693 eV 391.21 nm f=0.1287 <S\*\*2>=0.000

378 -> 386 0.39439

381 -> 386 0.34908

384 -> 387 -0.35367

385 -> 389 0.23926

Excited State 8: Singlet-A 3.2180 eV 385.28 nm f=0.0460 <S\*\*2>=0.000

378 -> 386 0.55187

381 -> 386 -0.33856

384 -> 387 0.15978

385 -> 389 -0.17649

Excited State 9: Singlet-A 3.2642 eV 379.83 nm f=0.0646 <S\*\*2>=0.000

381 -> 386 -0.15678

384 -> 387 0.24982

384 -> 389 0.12107

385 -> 389 0.62012

Excited State 10: Singlet-A 3.3735 eV 367.53 nm f=0.0205 <S\*\*2>=0.000

368 -> 386 -0.12529

370 -> 386 0.28073

371 -> 386 -0.10338

372 -> 386 0.43712

381 -> 386 -0.20198

384 -> 387 -0.32551

- **Excitation energies and oscillator strengths of E2 (B3LYP functional with 6-31G(d,p) basis set of Gaussian 16 software package).**

Excited State 1: Singlet-A 2.0109 eV 616.56 nm f=2.3473 <S\*\*2>=0.000

613 -> 614 0.69794

This state for optimization and/or second-order correction.

Total Energy, E(TD-HF/TD-DFT) = -7083.29410517

Copying the excited state density for this state as the 1-particle RhoCI density.

Excited State 2: Singlet-A 2.2293 eV 556.15 nm f=0.0001 <S\*\*2>=0.000

612 -> 614 0.70155

Excited State 3: Singlet-A 2.4469 eV 506.71 nm f=0.1595 <S\*\*2>=0.000

611 -> 614 0.69792

Excited State 4: Singlet-A 2.7630 eV 448.73 nm f=0.0069 <S\*\*2>=0.000

610 -> 614 0.70576

Excited State 5: Singlet-A 2.7651 eV 448.39 nm f=0.0054 <S\*\*2>=0.000

609 -> 614 0.70283



Excited State 6: Singlet-A 2.7838 eV 445.37 nm  $f=0.0010$   $\langle S^{**2} \rangle = 0.000$

606 -> 614 0.10317

608 -> 614 -0.40097

613 -> 615 0.54616

Excited State 7: Singlet-A 2.8445 eV 435.88 nm  $f=0.0990$   $\langle S^{**2} \rangle = 0.000$

607 -> 614 0.63462

608 -> 614 -0.22410

613 -> 615 -0.15416

Excited State 8: Singlet-A 2.8474 eV 435.44 nm  $f=0.0156$   $\langle S^{**2} \rangle = 0.000$

607 -> 614 0.27206

608 -> 614 0.51933

613 -> 615 0.36521

Excited State 9: Singlet-A 2.9749 eV 416.77 nm  $f=0.8372$   $\langle S^{**2} \rangle = 0.000$

612 -> 615 0.48816

612 -> 617 -0.23114

613 -> 616 -0.10642

613 -> 617 -0.35411

613 -> 618 0.14588

Excited State 10: Singlet-A 2.9765 eV 416.54 nm  $f=0.6273$   $\langle S^{**2} \rangle = 0.000$

611 -> 616 -0.14505

612 -> 616 -0.37179

613 -> 616 0.55187

#### **Experimental details of harvest, extraction, and FAME analysis.**

In order to prepare dry biomass for FAME analysis, microalgal samples were centrifuged at 4,000 rpm for 20 min

and washed once with deionized water. These cells were then re-centrifuged under the same conditions and freeze-dried at  $-70\text{ }^{\circ}\text{C}$  for 96 h.

Afterwards, lipid extraction from the dry biomass and subsequent FAME analysis were conducted at the National Instrumentation Center for Environmental Management (NICEM) in Seoul National University (SNU) following the previous literatures.<sup>29</sup> Agilent 7890A gas chromatography (GC) with flame ionization detector (FID) and Agilent DB-23 column ( $60\text{ mm} \times 0.25\text{ mm} \times 0.25\text{ }\mu\text{m}$ ) were used for the analysis. Besides, FAME contents and its compositions were determined by using Supelco 37 Component FAME Mix as a standard and pentadecanoic acid (Sigma-aldrich) as an internal standard. Following are the details of the GC instrumentation and methods; column injector temperature:  $250\text{ }^{\circ}\text{C}$  and FID detector temperature:  $280\text{ }^{\circ}\text{C}$  with  $\text{H}_2$  ( $35\text{ mL/min}$ ), Air ( $350\text{ mL/min}$ ), and He ( $35\text{ mL/min}$ ); GC oven program:  $50\text{ }^{\circ}\text{C}$  (1 min hold),  $25\text{ }^{\circ}\text{C/min}$  to  $130\text{ }^{\circ}\text{C}$  (0 min hold),  $8\text{ }^{\circ}\text{C/min}$  to  $170\text{ }^{\circ}\text{C}$  (0 min hold),  $1.5\text{ }^{\circ}\text{C/min}$  to  $215\text{ }^{\circ}\text{C}$  (0 min hold), and  $5\text{ }^{\circ}\text{C/min}$  to  $250\text{ }^{\circ}\text{C}$  (5 min hold); injection:  $1\text{ }\mu\text{L}$  (split ratio of 1:10).
